# Supplementary material for: Altered Circulating Follicular T Helper Cell Subsets and Follicular T Regulatory Cells Are Indicators of a Derailed B Cell Response in Lupus, Which Could Be Modified by Targeting IL-21R
Source: MDPI journal article supplement (doi:10.3390/ijms232012209), 2022-10-13
Supplement: s1 [file s1]

## Supplementary Material

# Altered circulating follicular helper T cell subsets and follicular regulatory T cells are indicators of a derailed B cell response in lupus, which could be modified by targeting IL-21R

Krisztina Szabó <sup>1,\*</sup>, Ilona Jámor <sup>1</sup>, Kitti Pázmándi <sup>2</sup>, Nikolett Nagy <sup>1</sup>, Gábor Papp <sup>1†</sup> and Tünde Tarr <sup>1†</sup>

<sup>1</sup> Division of Clinical Immunology, Institute of Internal Medicine, Faculty of Medicine, University of Debrecen, H-4032 Debrecen, Hungary

<sup>2</sup> Department of Immunology, Faculty of Medicine, University of Debrecen, Debrecen, Hungary

\* Correspondence: krisztinaszabo@med.unideb.hu

† These authors share last authorship.

## Supplementary Figure S1.

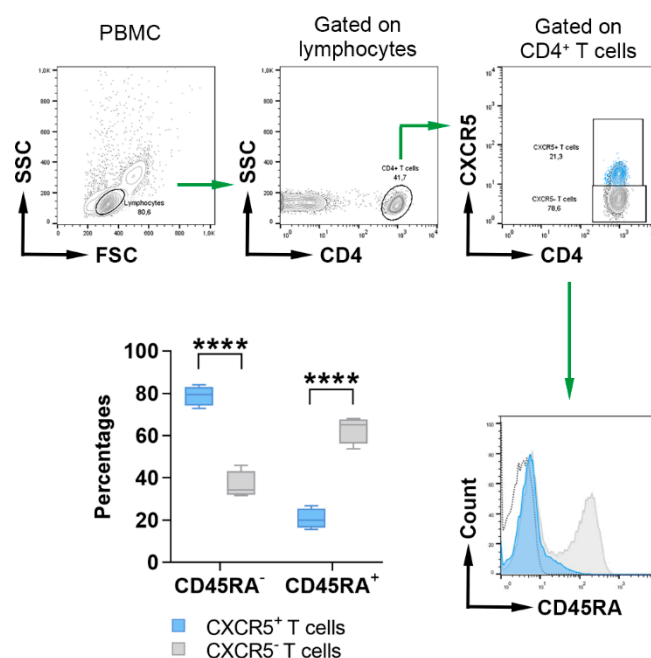

**Supplementary Figure S1.** Peripheral blood T<sub>FH</sub> cells represent a circulating pool of CD45RA<sup>-</sup>CD4<sup>+</sup> memory T cells. The representative contour plots show the gating strategy of CD4<sup>+</sup>CXCR5<sup>+</sup> T cells. A representative histogram demonstrates the expression of CD45RA on CD4<sup>+</sup>CXCR5<sup>-</sup> T cells (clear grey) and CD4<sup>+</sup>CXCR5<sup>+</sup> T cells (blue shaded). CD45RA-PE Fluorescence Minus One (FMO) controls showed with dotted line. Percentages of CD45RA<sup>-</sup> and CD45RA<sup>+</sup> cells in CXCR5<sup>-</sup> and CXCR5<sup>+</sup> T cells in healthy individuals (n = 4). Two-way analysis of variance (ANOVA) with Sidak post hoc test was used. Box plots represent the interquartile range (IQR) with a line in the middle as median. Statistically significant differences are indicated by \*\*\*\**p* < 0.0001.

## Supplementary Figure S2.

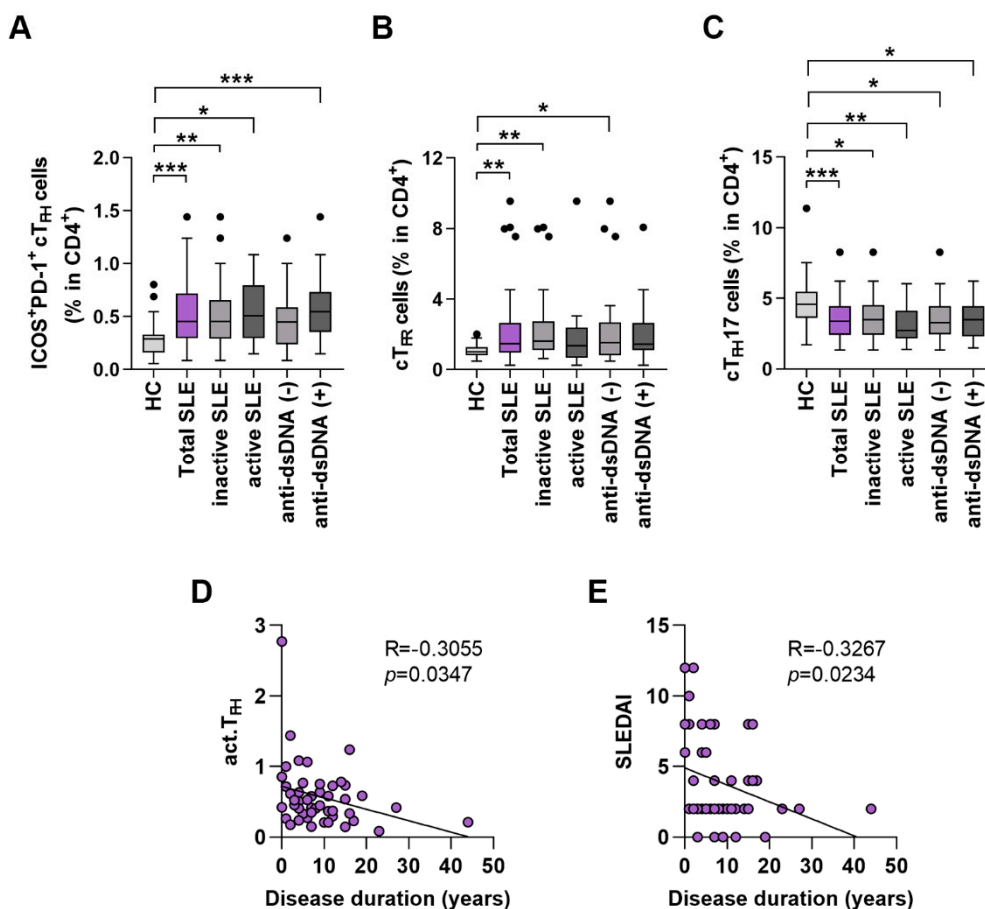

**Supplementary Figure S2.** The distribution of cT<sub>FH</sub> subsets in patients with SLE and their association with disease activity and the presence of autoantibody. PBMCs were isolated from 48 SLE patients and 36 healthy controls (HC) then were stained with fluorochrome-conjugated monoclonal antibodies as described previously. The percentages of blood cT<sub>FH</sub> cell subsets were quantified as their percentage within CD4<sup>+</sup> lymphocytes. **(A)** Percentages of ICOS<sup>+</sup>PD-1<sup>+</sup> activated cT<sub>FH</sub> subsets in lupus patients with inactive/mild (SLEDAI 0-4, n = 34) and active/moderate (SLEDAI 6-12; n = 14) activity, SLE with anti-dsDNA (30 < IU/mL; n = 24) and without anti-dsDNA (0-30 IU/mL; n = 24) and HCs. **(B)** Proportions of CD25<sup>+</sup>CD127<sup>lo/-</sup> cT<sub>FR</sub> cells in SLE patients with inactive/mild (SLEDAI 0-4, n = 34) and active/moderate (SLEDAI 6-12; n = 14) activity, SLE with anti-dsDNA (30 < IU/mL; n = 24) and without anti-dsDNA (0-30 IU/mL; n = 24) and HCs. **(C)** Frequencies of CXCR3-CCR6<sup>+</sup> cT<sub>FH</sub>17 cells in SLE patients with inactive/mild (SLEDAI 0-4, n = 34) and active/moderate (SLEDAI 6-12; n = 14) activity, SLE with anti-dsDNA (30 < IU/mL; n = 24) and without anti-dsDNA (0-30 IU/mL; n = 24) and HCs. **(D)** Correlation analysis between the duration of the disease and the percentages of activated cT<sub>FH</sub> cells. **(E)** Correlation analysis between the duration of the disease and SLEDAI scores. Kruskal–Wallis test with Dunn’s multiple comparisons test was used. Correlation analysis was performed using Spearman’s test. Box plots represent the interquartile range (IQR) with a line in the middle as median. Statistically significant differences are indicated by \* $p < 0.05$ ; \*\* $p < 0.01$ ; \*\*\* $p < 0.001$ .

## Supplementary Figure S3.

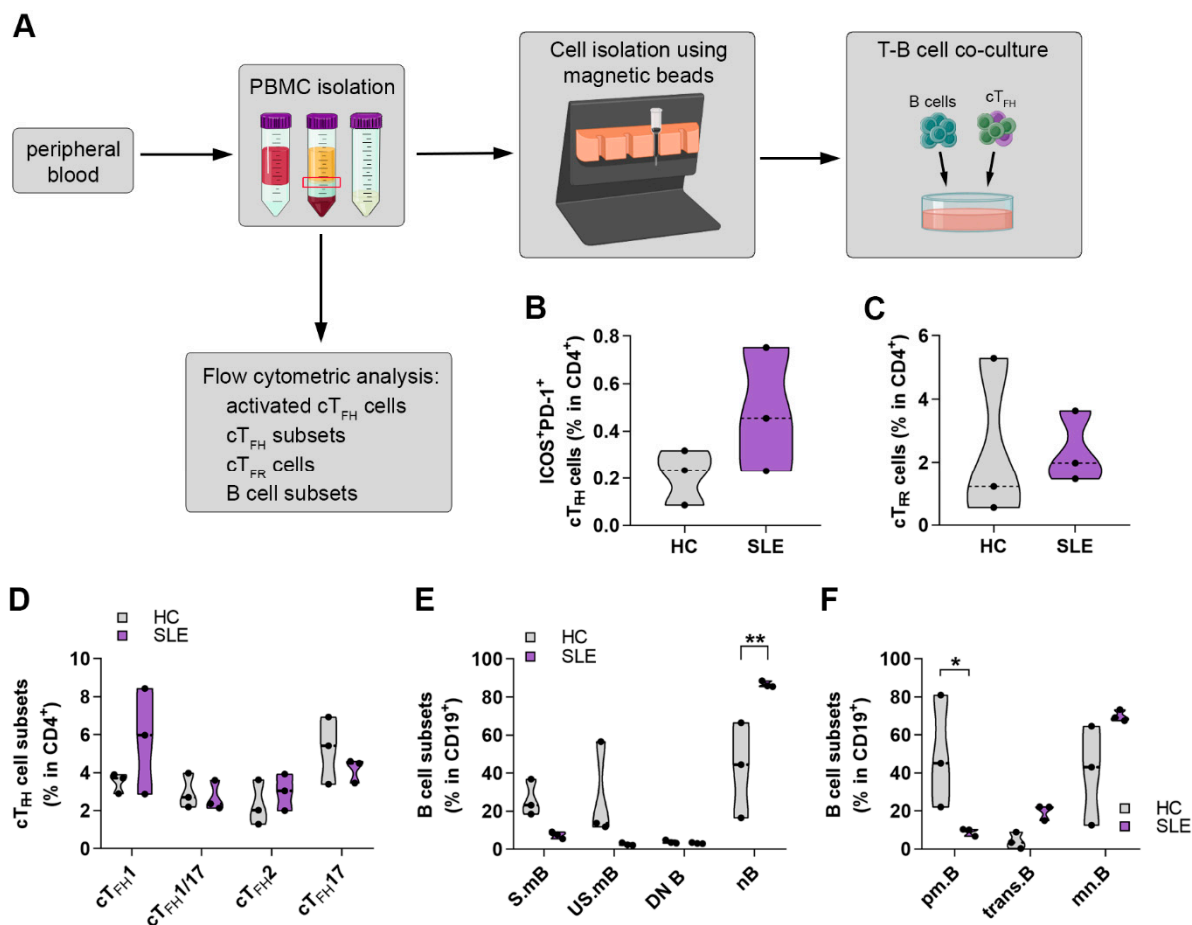

**Supplementary Figure S3.** The distribution of activated  $cT_{FH}$  cells,  $cT_{FH}$  subsets,  $cT_{FR}$  cells and B cell subsets in SLE patients and healthy controls subjected to IL-21R inhibition analysis. **(A)** Schematic representation of the workflow. Before proceeding to magnetic isolation, PBMCs from patients ( $n = 3$ ) and healthy controls (HC,  $n = 3$ ) were stained with fluorochrome-conjugated monoclonal antibodies as described in the main text. The percentages of blood  $cT_{FH}$  cell subsets were quantified within CD4<sup>+</sup> lymphocytes while the frequencies of B cell subsets were quantified within CD19<sup>+</sup> B cells. **(B)** Percentages of ICOS<sup>+</sup>PD-1<sup>+</sup> activated  $cT_{FH}$  cells. **(C)** Proportions of CD25<sup>+</sup>CD127<sup>lo/-</sup>  $cT_{FR}$  cells. **(D)** Frequencies of  $cT_{FH}$  subsets. **(E)** Proportions of naïve and memory B cell subsets: IgD<sup>+</sup>CD27<sup>-</sup> naïve B (nB), IgD<sup>+</sup>CD27<sup>+</sup> un-switched memory B (US.mB), IgD<sup>-</sup>CD27<sup>+</sup> switched memory B cell (S.mB), IgD<sup>-</sup>CD27<sup>-</sup> double negative (DN) B cells. **(F)** Percentages of trans.B, mn.B and pm.B cell subpopulations: CD38<sup>hi</sup>CD24<sup>hi</sup>CD27<sup>-</sup> transitional B (trans.B), CD38<sup>int</sup>CD24<sup>int</sup> mature-naïve B (mn.B), CD38<sup>hi</sup>CD24<sup>hi</sup>CD27<sup>+</sup> primarily memory B (pm.B) cells. Unpaired t-test, Mann-Whitney test or two-way analysis of variance (ANOVA) with Sidak post hoc test was used. Violin plots with dashed line in the middle as median. Statistically significant differences are indicated by \* $p < 0.05$ ; \*\* $p < 0.01$ . [Magnetic isolation panel was created by Biorender.com.]

**Supplementary Table S1.**

**Supplementary Table S1.** Routine laboratory and clinical characteristic of patients with SLE subjected to IL-21R inhibition analysis.

| No. | Anti-dsDNA titer,<br>IU/mL | IC titer,<br>extinction | C3 titer,<br>g/L | C4 titer,<br>g/L | Clinical<br>manifestations                         |
|-----|----------------------------|-------------------------|------------------|------------------|----------------------------------------------------|
| 1   | 169.3                      | 76.0                    | 0.51             | 0.09             | malar rash, photosensitivity                       |
| 2   | 24.3                       | 138.0                   | 0.94             | 0.10             | non-erosive polyarthritis,<br>Raynaud's phenomenon |
| 3   | 15.9                       | 61.0                    | 1.01             | 0.14             | malar rash, photosensitivity                       |

SLE, systemic lupus erythematosus; IC, immune complex; C, complement component.
